# Supplementary material for: The tumor suppressor phosphatase PP2A-B56α regulates stemness and promotes the initiation of malignancies in a novel murine model
Source: PubMed Central journal article supplement (PMC5708644; doi:10.1371/journal.pone.0188910), 2017-11-30
Supplement: pone.0188910.s006.pdf [file pone.0188910.s006.pdf]

|                    | <b>Primer Sequence</b>      |
|--------------------|-----------------------------|
| <b>Forward-ex1</b> | 5'-CGCACCAGUUGCCUGCGC-3'    |
| <b>Reverse-ex1</b> | 5'-GGCAGGGGGTGCAGCTCC-3'    |
| <b>Reverse-ex3</b> | 5'-GCCAAGAGGCCTCAAGTGTGG-3' |
